# Supplementary material
Source: HighWire-hosted journal article supplement (https://jnm.snmjournals.org/highwire/filestream/95276/field_highwire_adjunct_files/0/198119_Supplemental_Data.pdf)
Supplement: 198119_Supplemental_Data.pdf [file 198119_Supplemental_Data.pdf]

| <b>miNa/b template</b>          | <b>Anatomical boundaries</b>                                                                                                                                                       |
|---------------------------------|------------------------------------------------------------------------------------------------------------------------------------------------------------------------------------|
| Internal iliac (II)             | bifurcation internal/external iliac arteries, pelvic floor, bladder wall, obturator nerve                                                                                          |
| External iliac (EI)             | bifurcation internal/external iliac arteries, circumflex iliac vein and endopelvic fascia, psoas muscle and genitofemoral nerve and medial border external iliac artery            |
| Common iliac (CI)               | aortic bifurcation, bifurcation internal/external iliac arteries, psoas muscle and genitofemoral nerve and medial border common iliac artery                                       |
| Obturator (OB)                  | bifurcation internal/external iliac arteries, pelvic floor, obturator nerve, and medial border external iliac artery                                                               |
| Presacral (PS, aka: presciatic) | Triangle between medial borders of common iliac arteries and line connecting internal/external iliac arteries' bifurcations; dorsal border: promontory and proximal sacrum (S1–S2) |

**Supplemental Table 1: Description of anatomical delineation of pelvic lymph node territories (adapted from Joniau et al; Nicolau et al.)**
